# Supplementary material for: CAPE activates AMPK and Foxo3 signaling to induce growth inhibition and ferroptosis in triple-negative breast cancer
Source: PubMed Central journal article supplement (PMC11676562; doi:10.1371/journal.pone.0315037), 2024-12-27

Figure 1

C

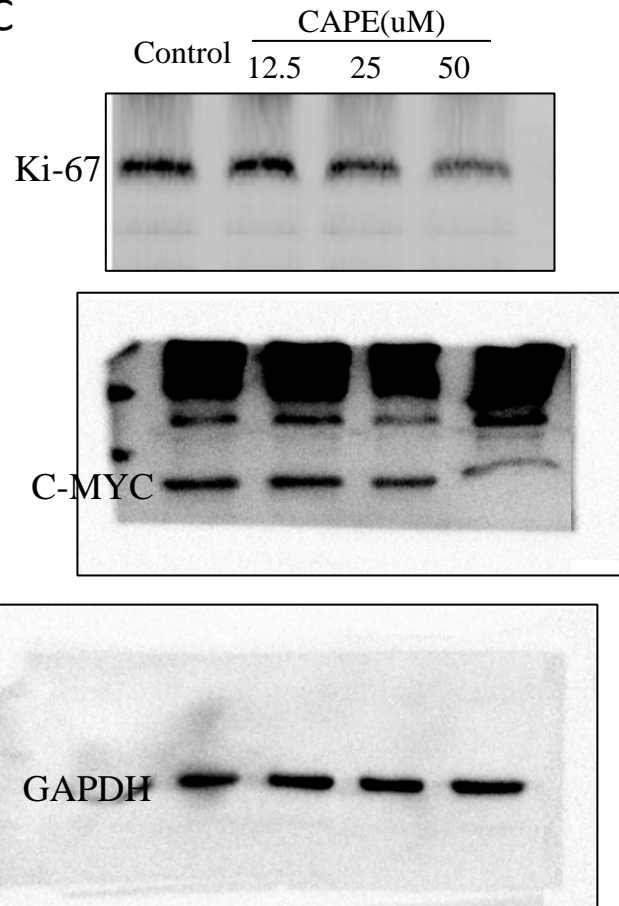

F

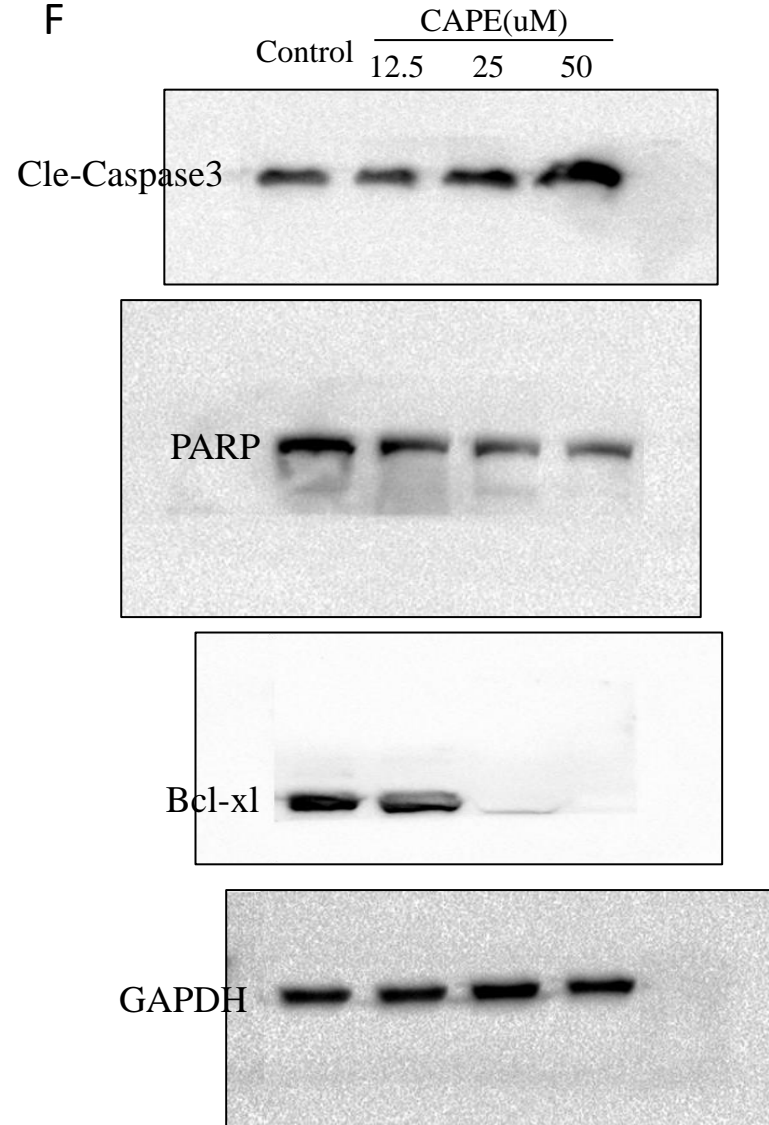

Figure2

G

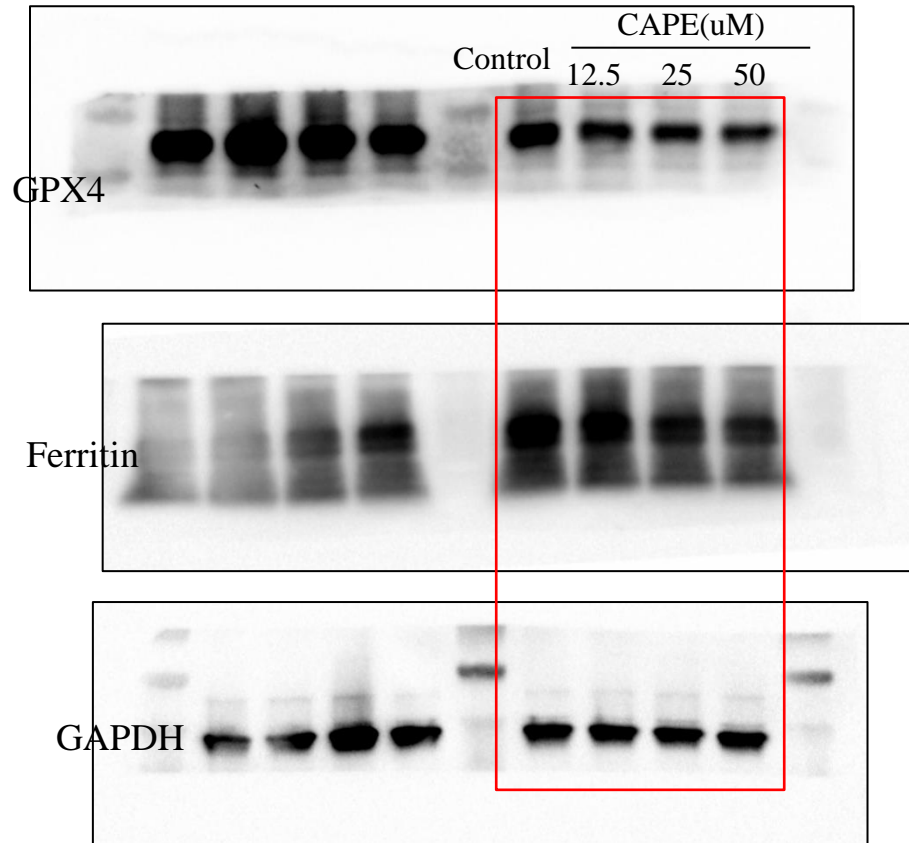

Figure 3

D

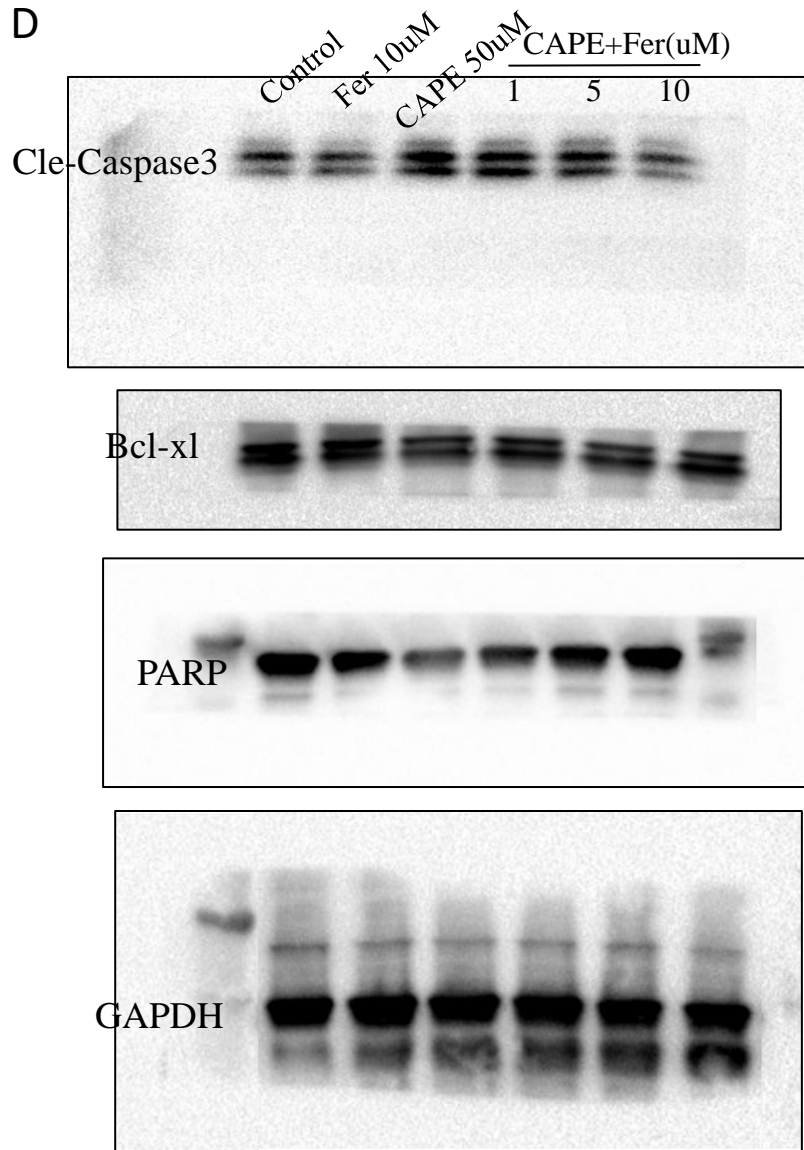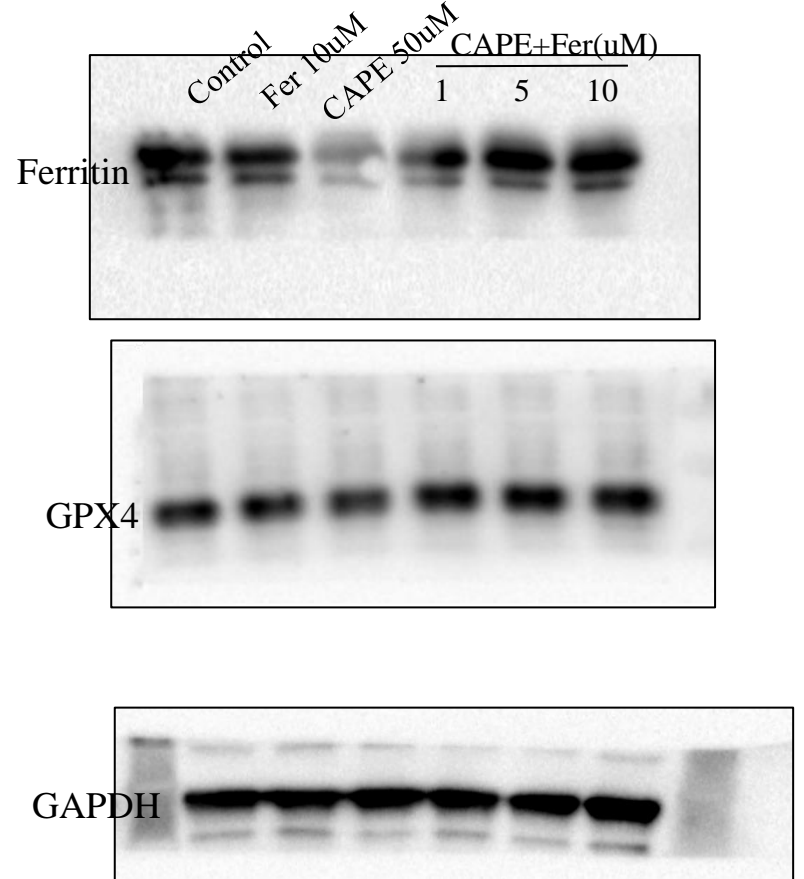

Figure4

A

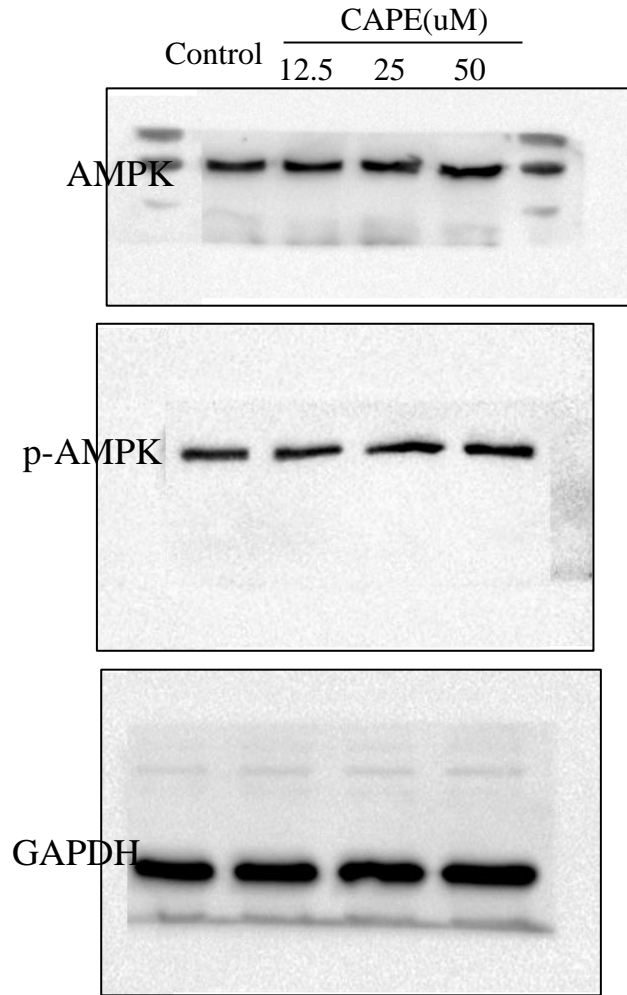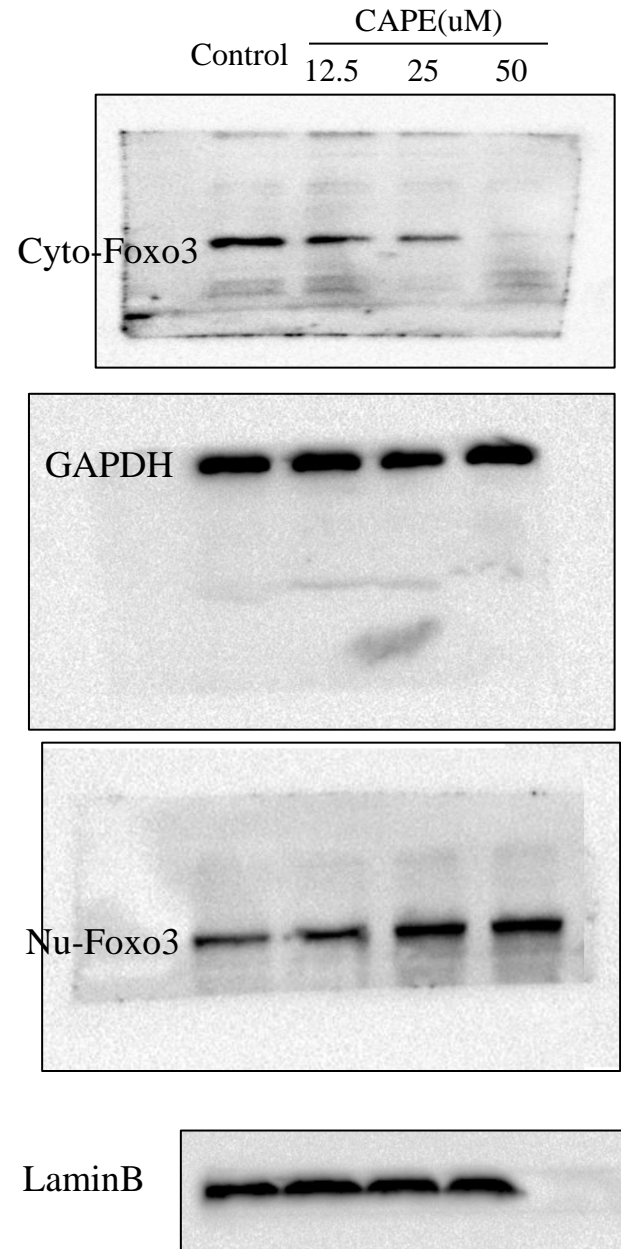

Figure4

C

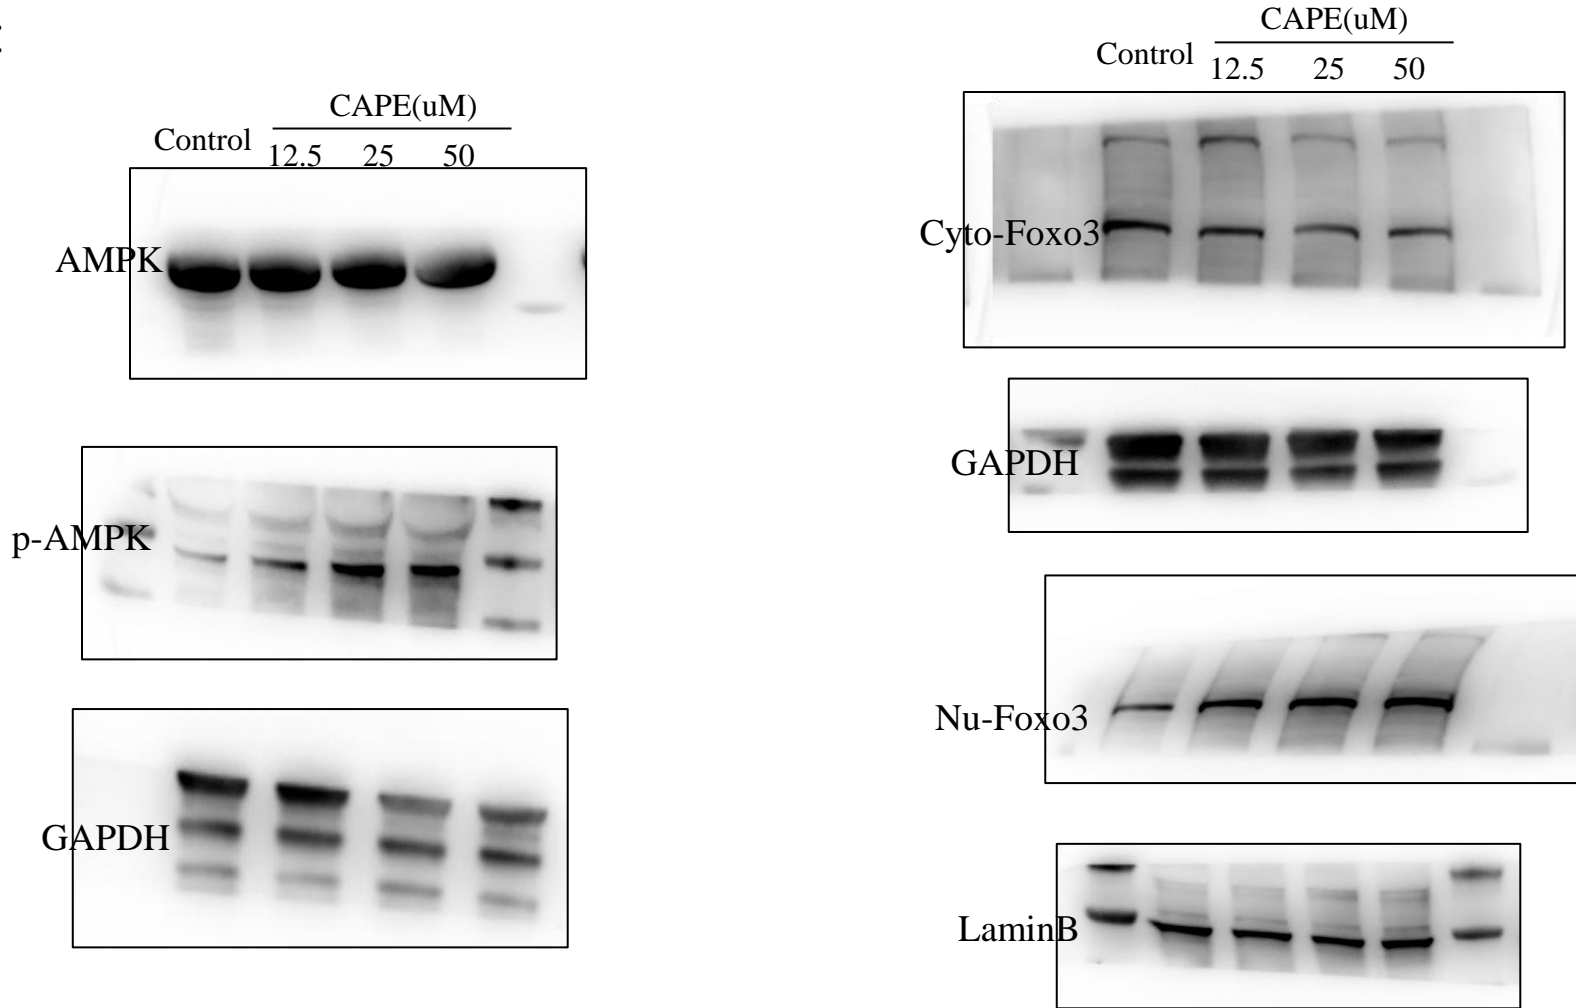



Figure 5

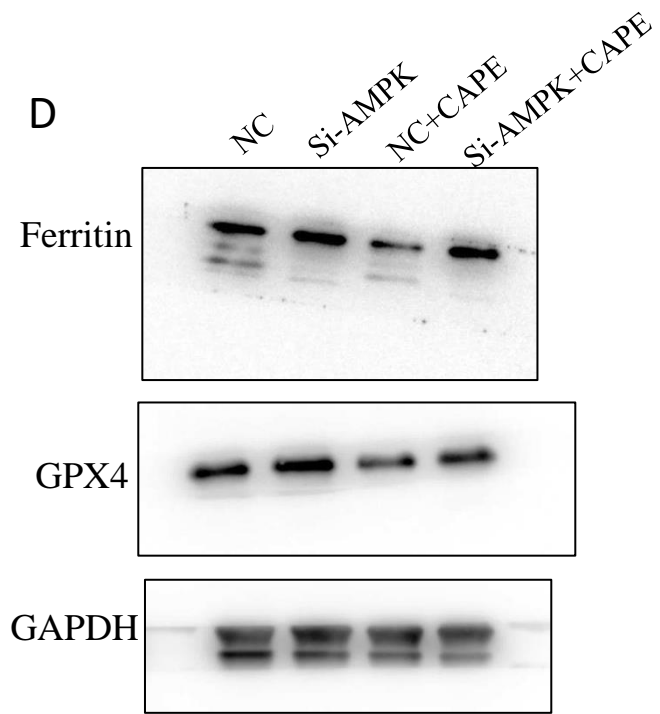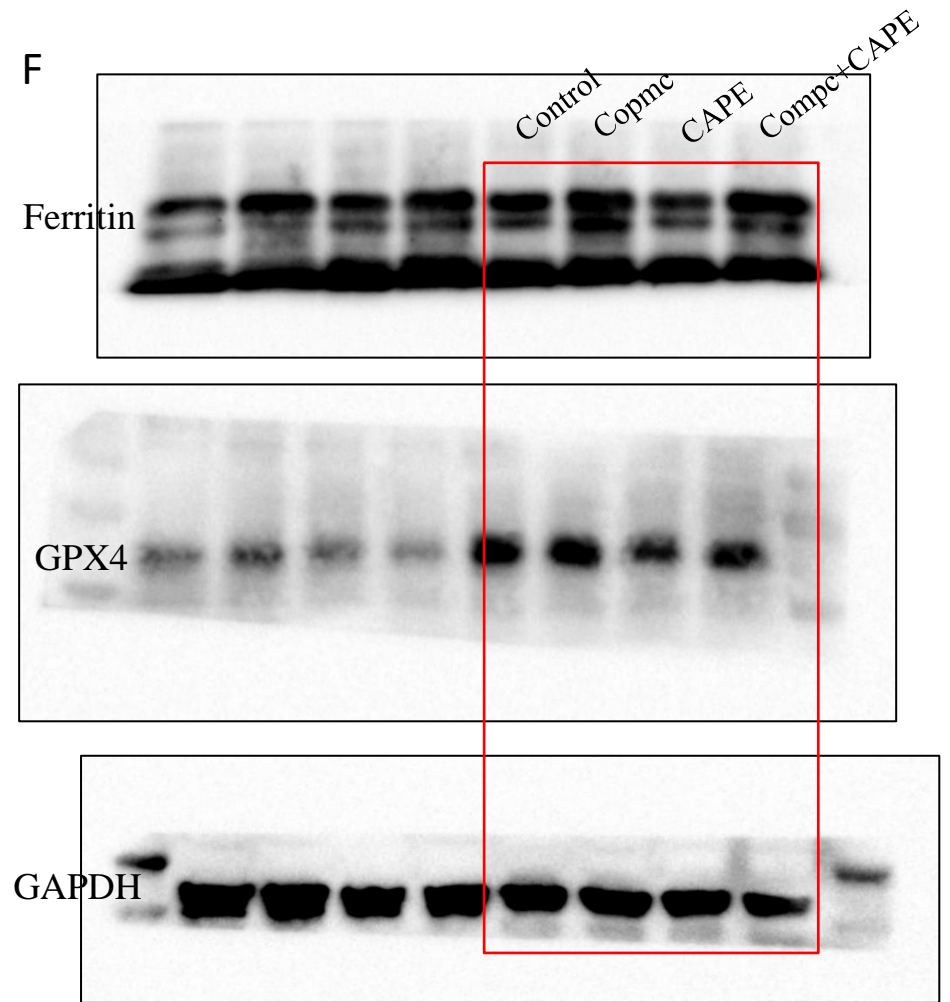



Figure6

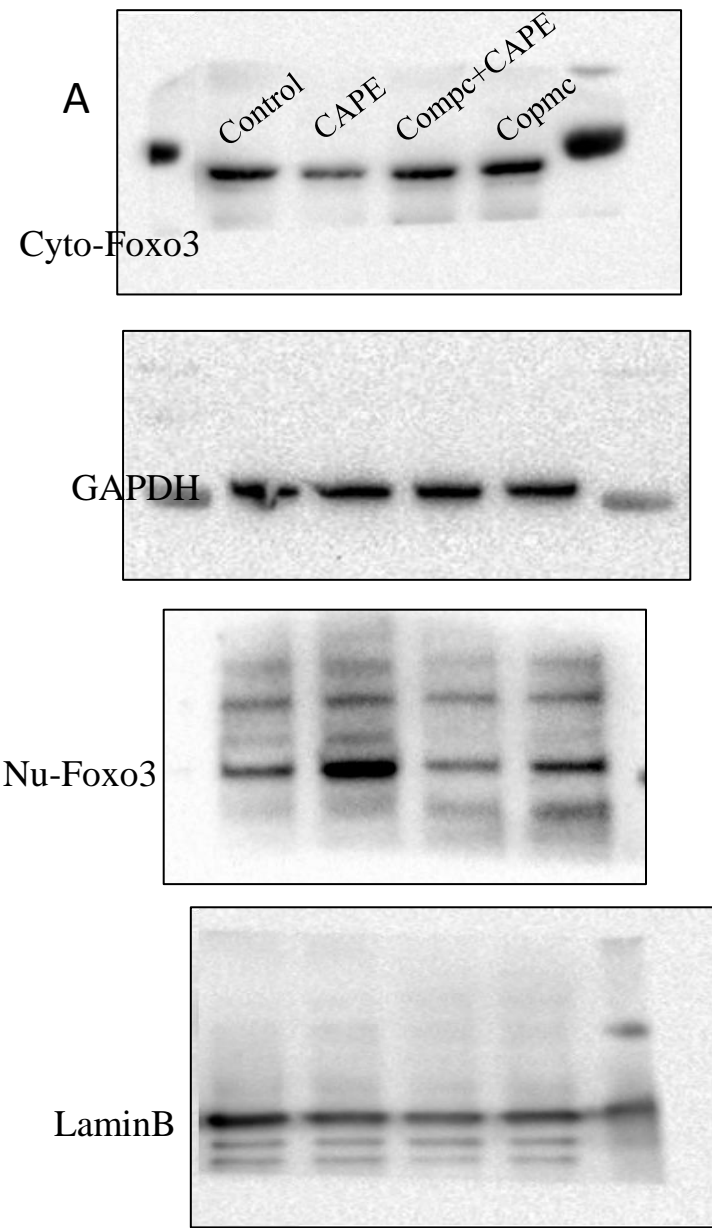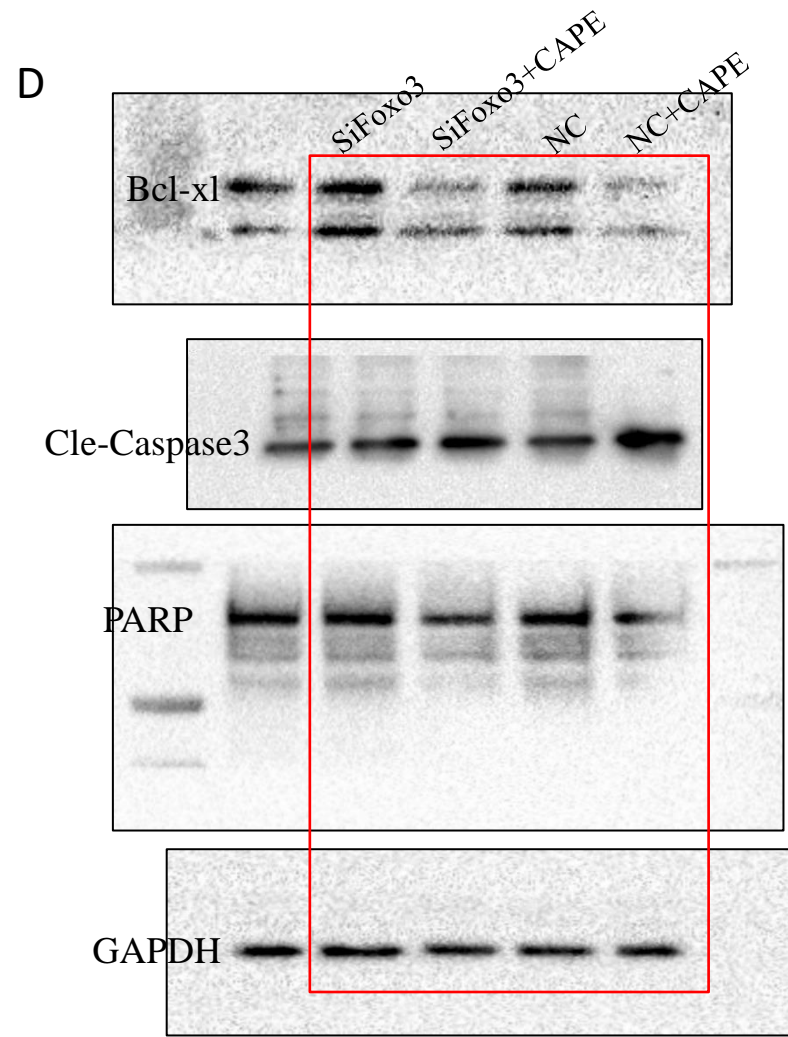



Figure6

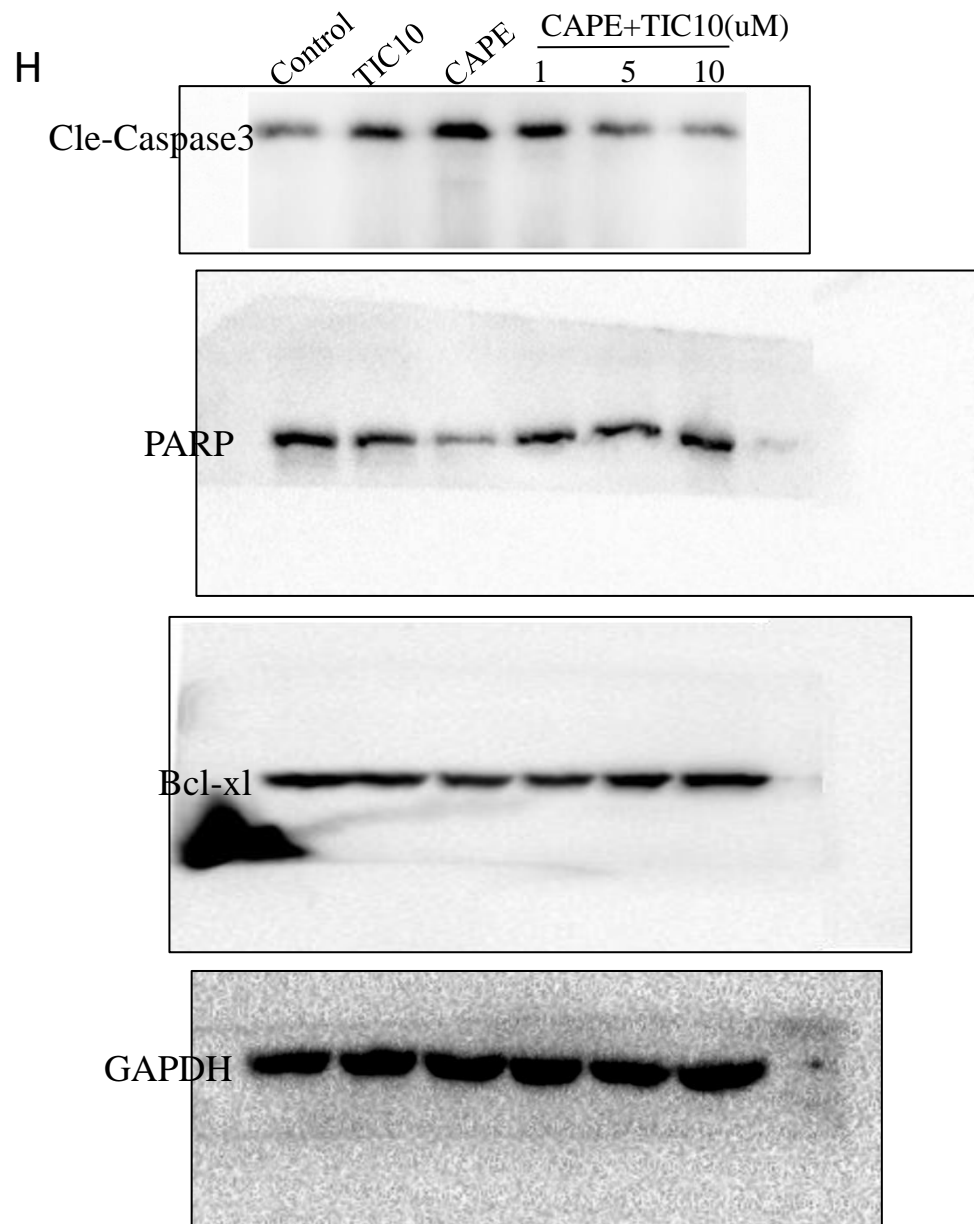

Figure6

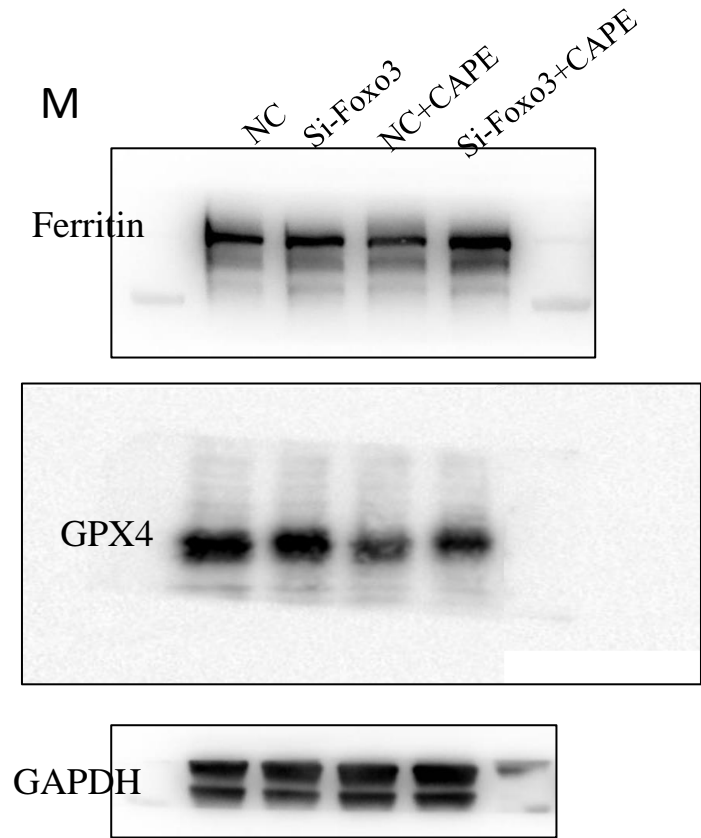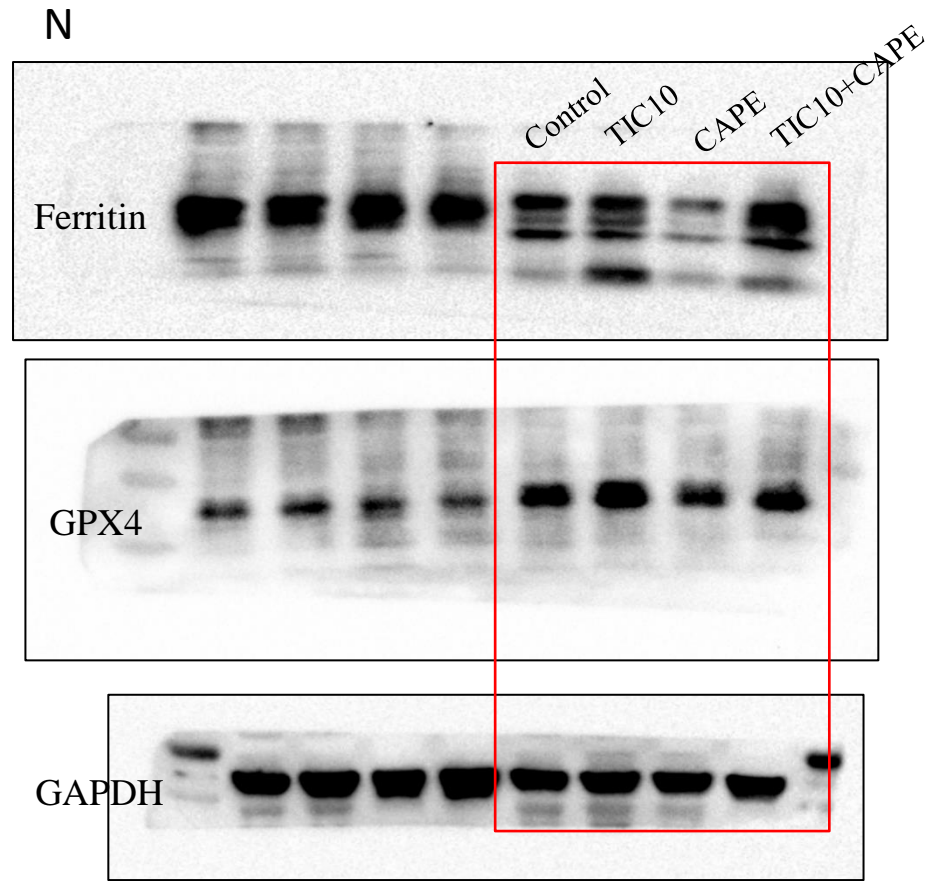

Figure7

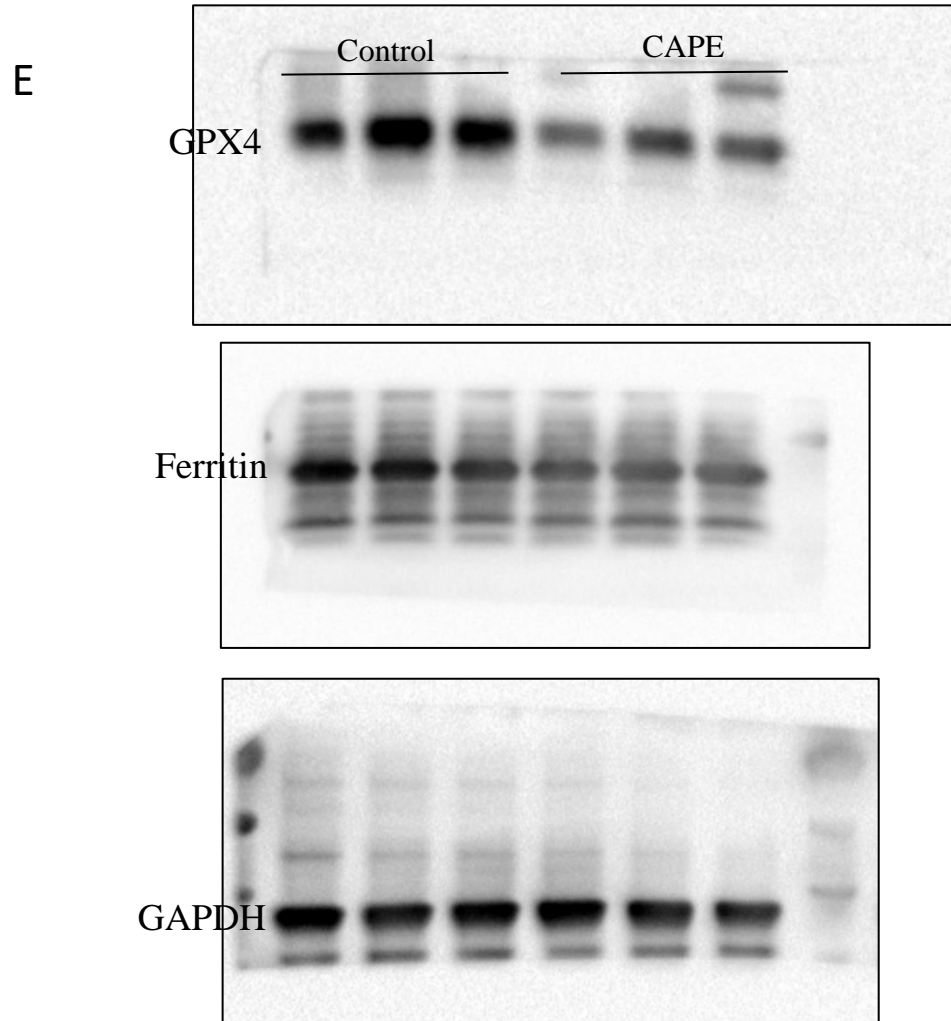

# SupFigure1

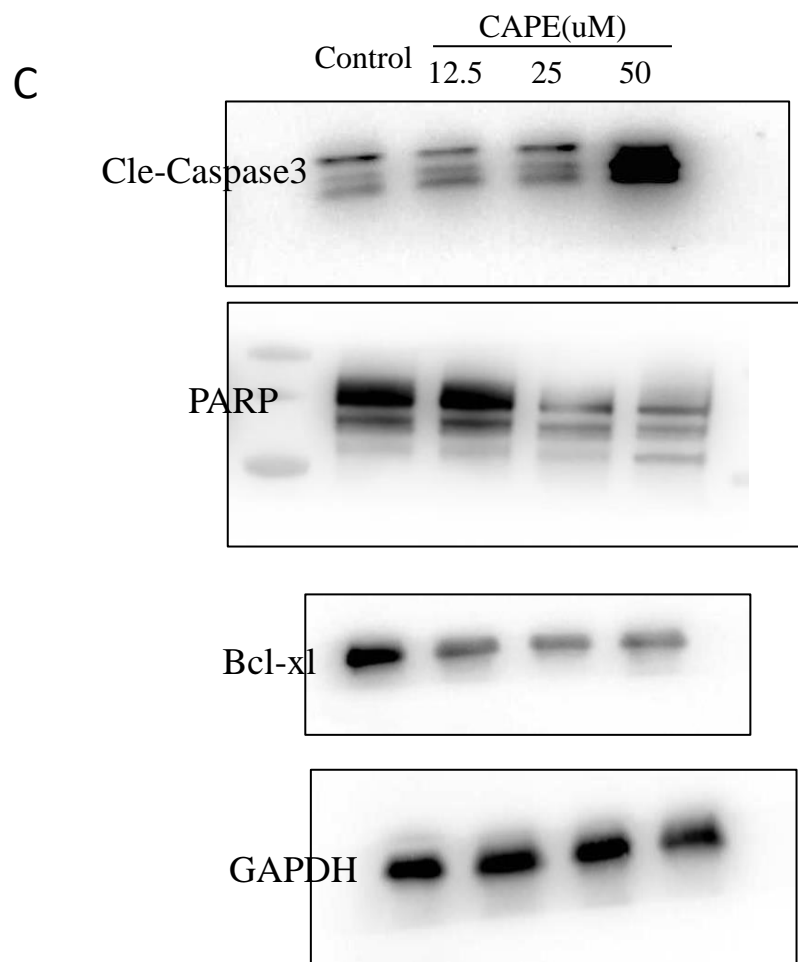

## SupFigure2

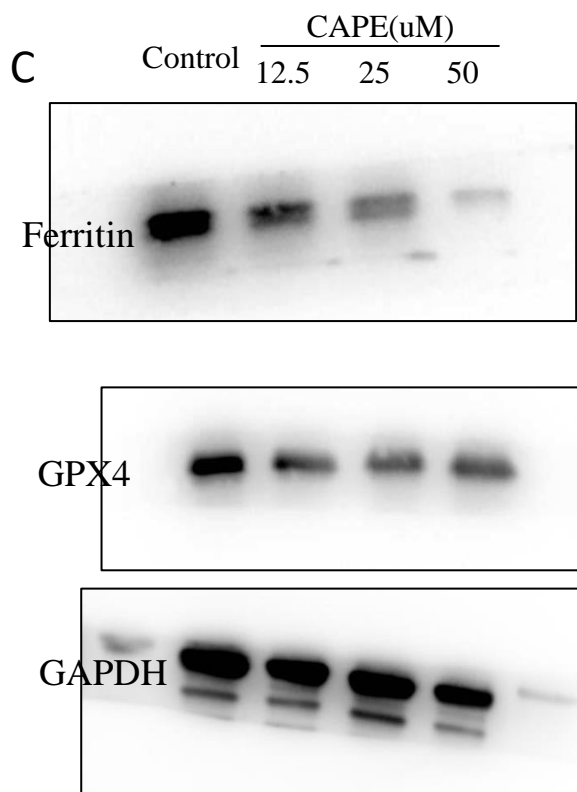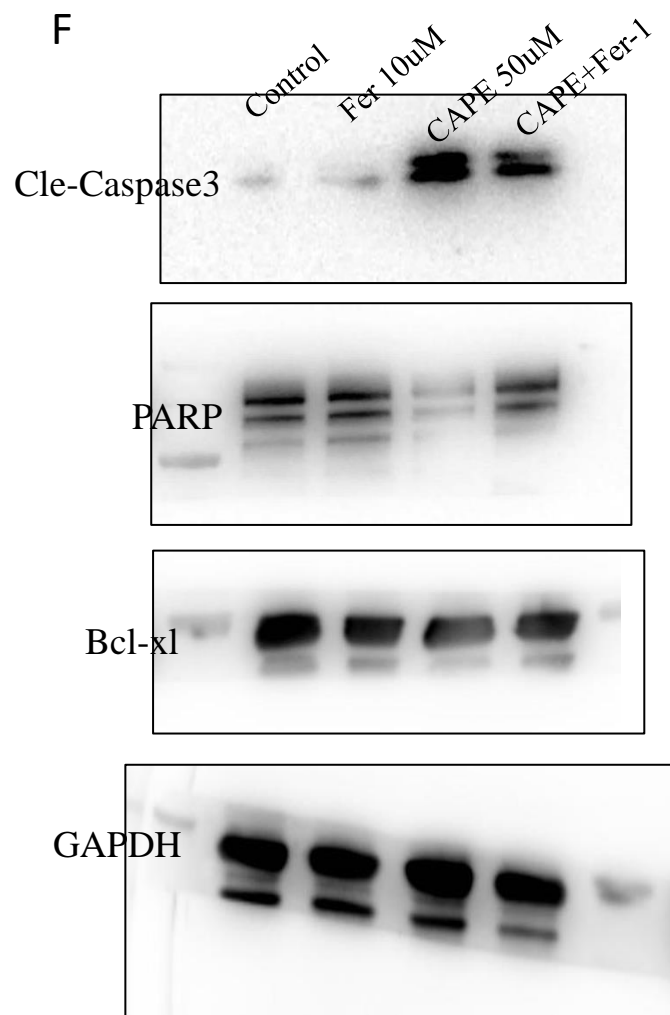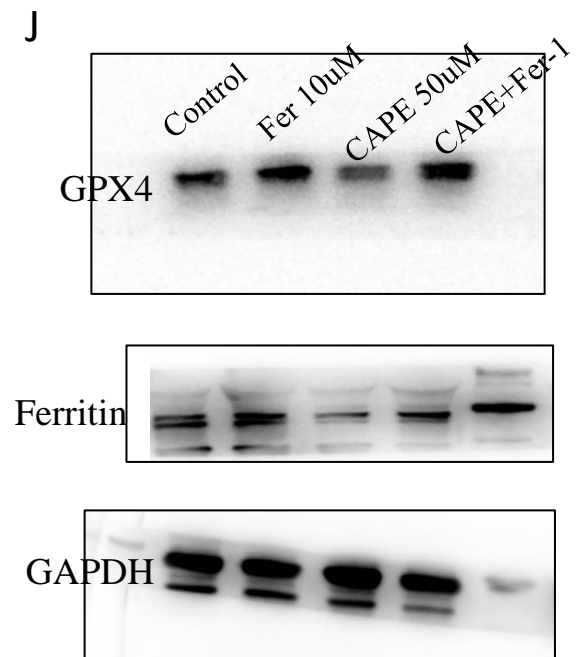

SupFigure3

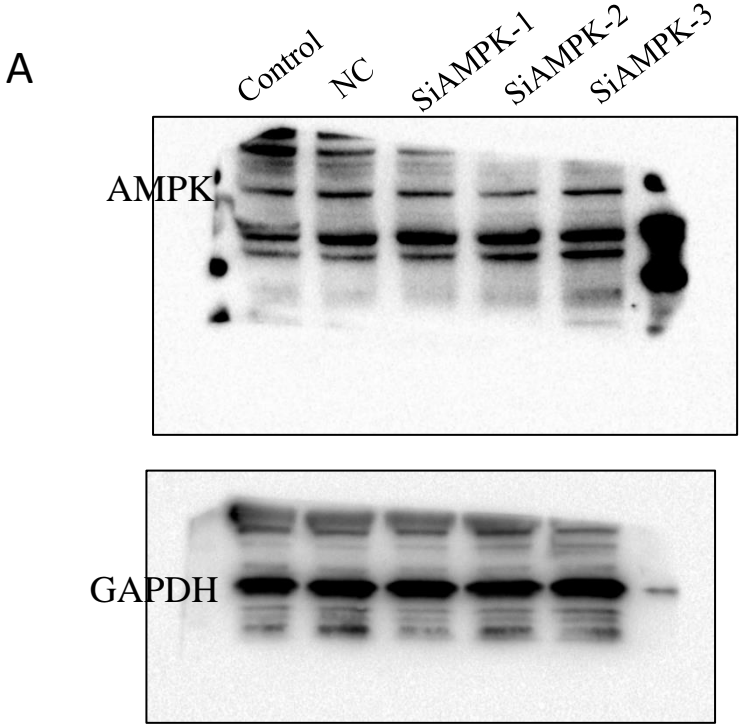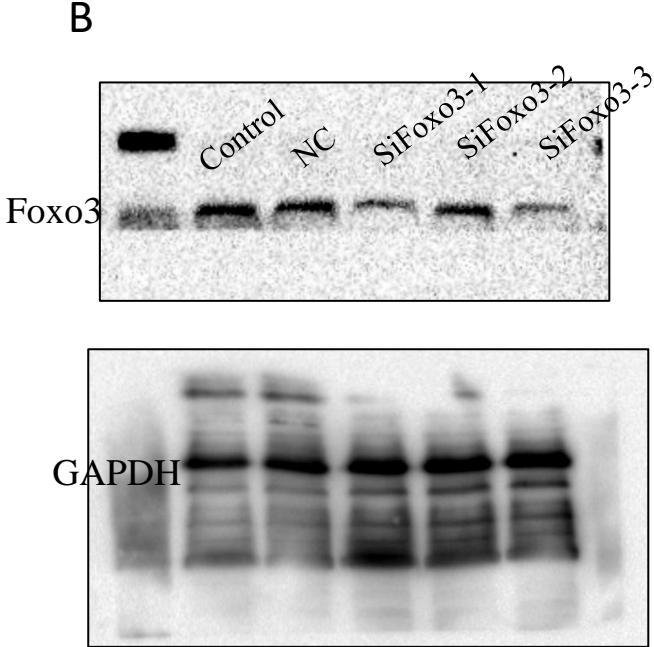

SupFigure3

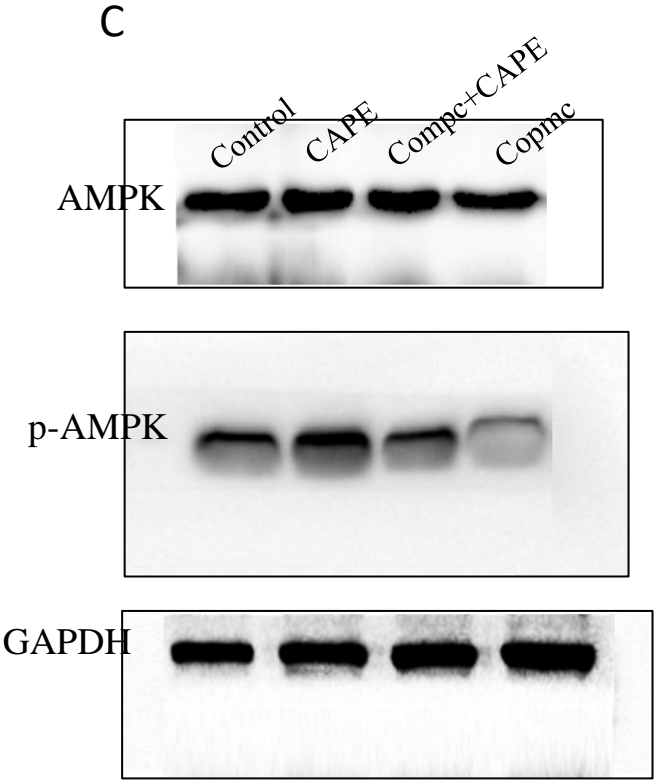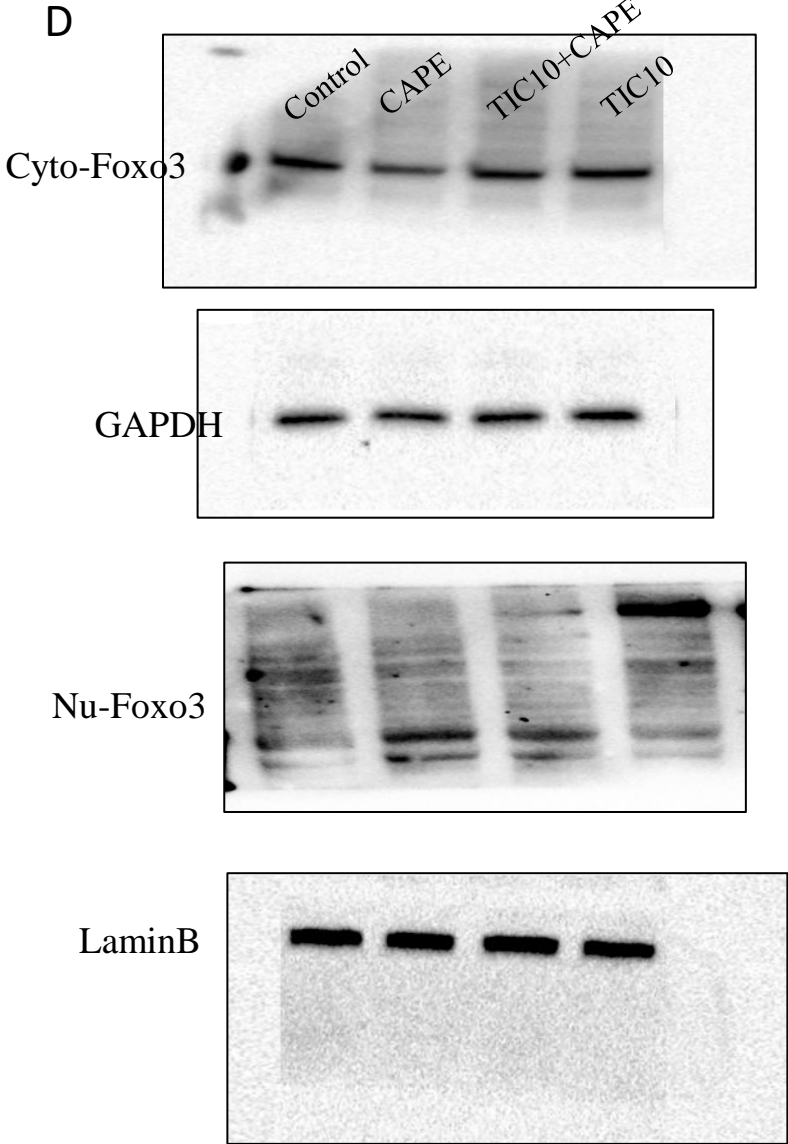



SupFigure3

E

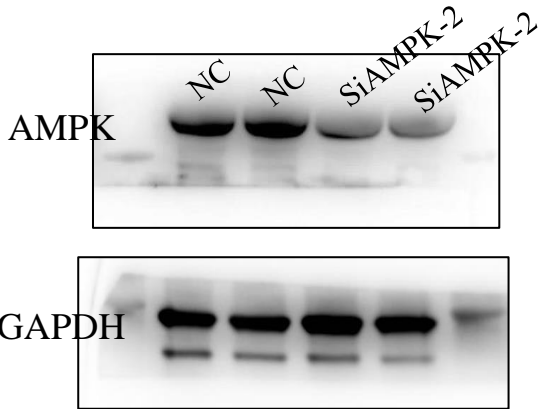

F

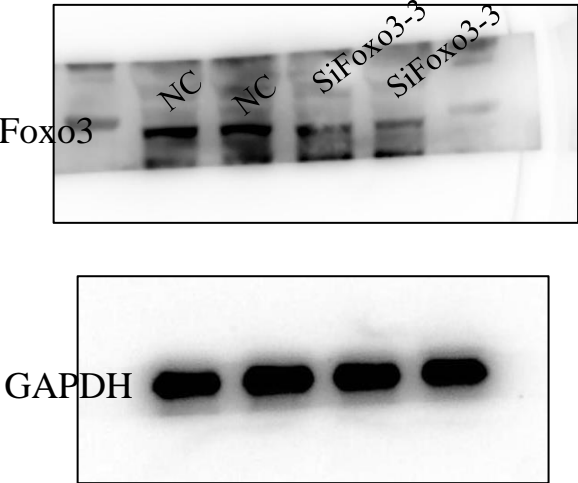

# SupFigure5

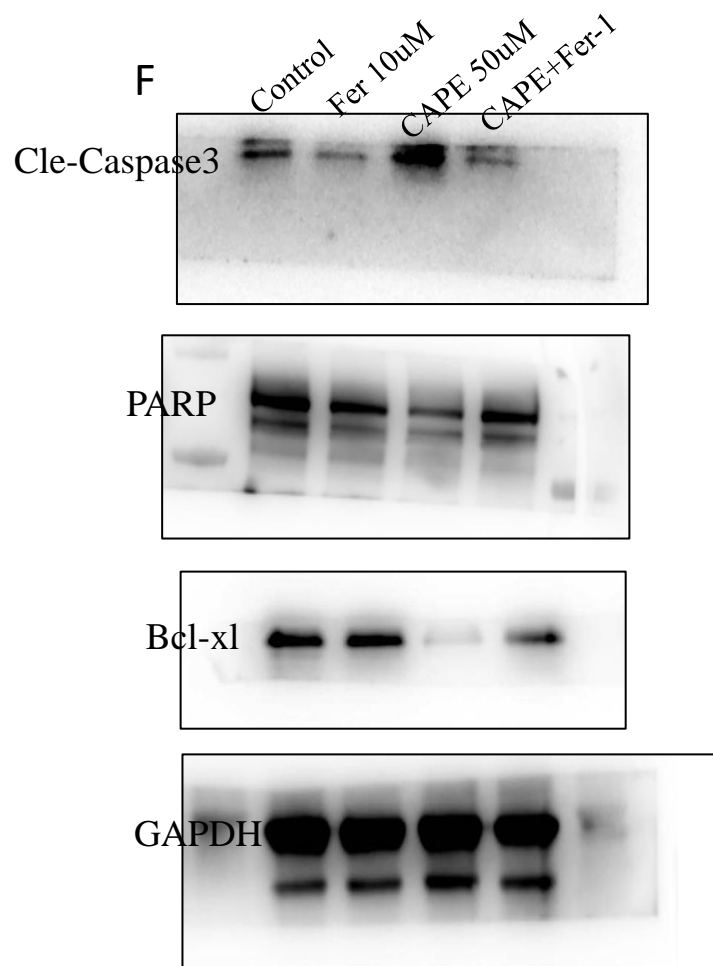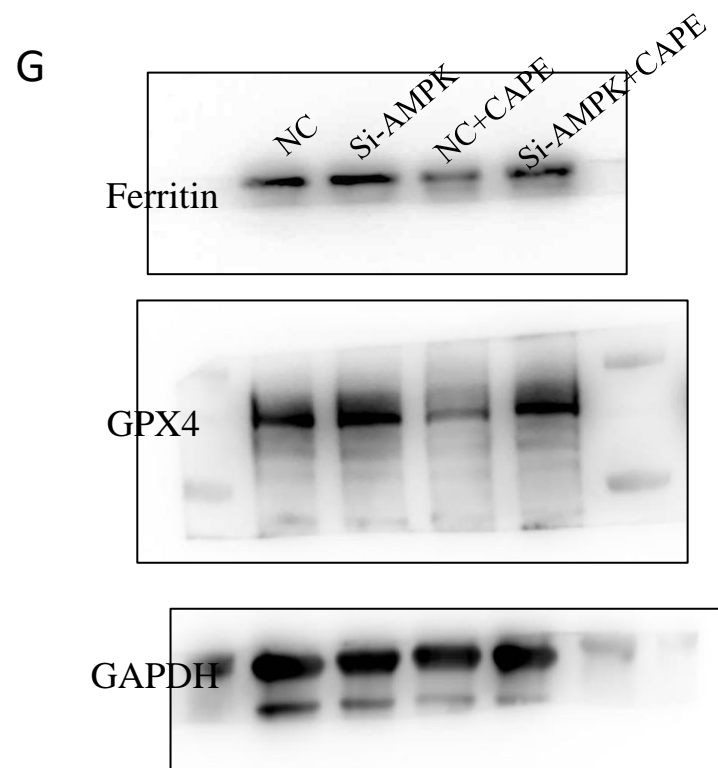

# SupFigure5

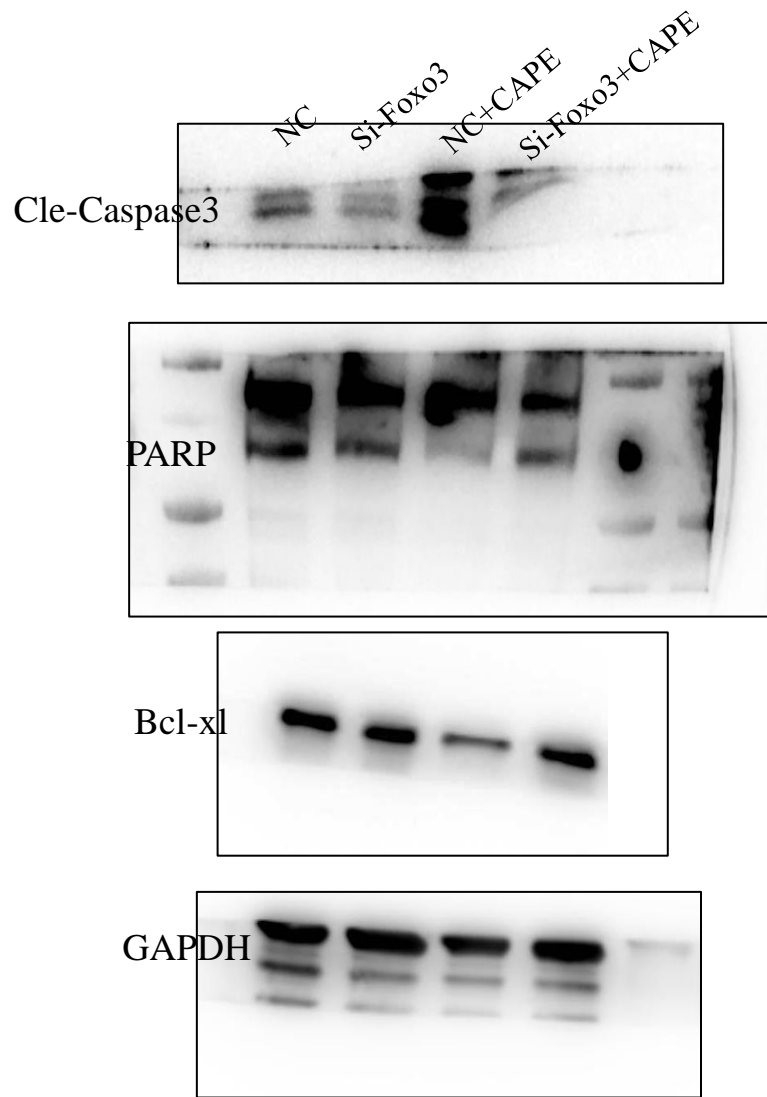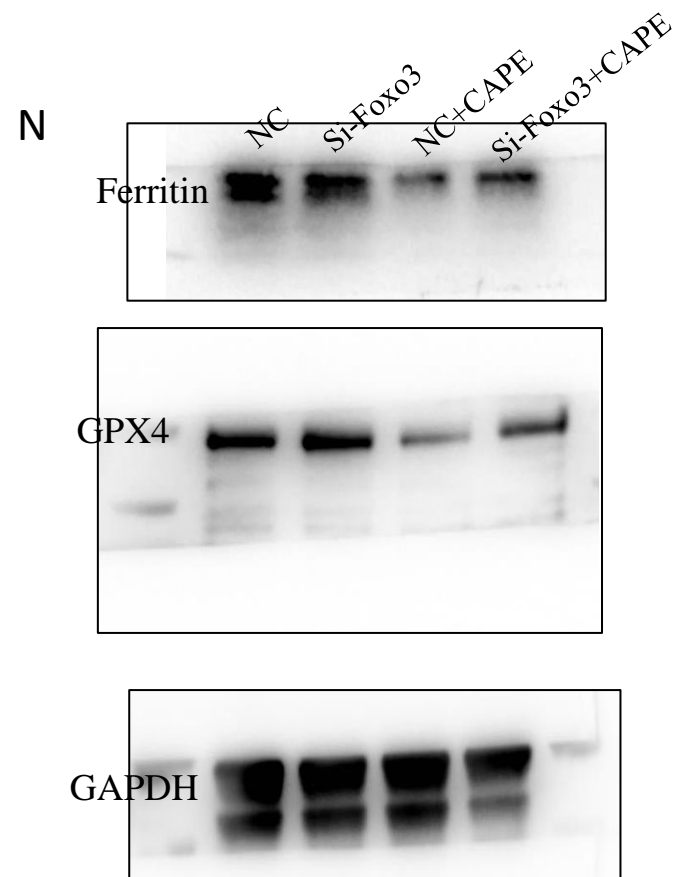

Supplement: pone.0315037.s006.pdf [file pone.0315037.s006.pdf]
